# Supplementary material
Source: Research Square preprint supplement (doi:10.21203/rs.3.rs-9614758/v1)
Supplement: Supplementary file 1 [file d1a6ca2d3391b38df33bd20d.docx]

# Supplementary File 1: Summarised version of the RECOLLECT Fidelity Measure

| **Non-modifiable Components** | | **0 (low fidelity) to 2** |
| --- | --- | --- |
| (1) Equality | | 0 to 2 |
| (2) Adult Learning | | 0 to 2 |
| (3) Tailoring to the Student | | 0 to 2 |
| (4) Co-production | | 0 to 2 |
| (5) Social Connectedness | | 0 to 2 |
| (6) Community Focus | | 0 to 2 |
| (7) Commitment to Recovery | | 0 to 2 |
| *Total Fidelity Score (Sum of 1 to 7)* | | *0 to 14* |
|  | | |
| **Modifiable Components** | **Type 1** | **Type 2** |
| (8) Available to All | The Recovery College is available to all. | The Recovery College is limited to specific groups. |
| (9) Location | The Recovery College is based in a community location that is not shared with health, social care or other statutory services. | The Recovery College is based in a location which is shared with health, social care or other statutory services. |
| (10) Distinctiveness of Course Content | Any topic can be offered as a course, irrespective of whether it is available in mainstream adult education settings. | Only topics not available in mainstream adult education settings are offered. |
| (11) Strengths-based | A focus on strengths (not problems) is implicit in the college. | A focus on strengths (not problems) is explicit in the college, in addition to dimensions 1-7 above. |
| (12) Progressive | There is a focus on ‘being’ and ‘belonging’, not on goal-setting. | There is a focus on ‘becoming’ and a strong emphasis on goal-setting and change. |

# Supplementary File 2: ACCORD checklist

| **Item No.** | **Section** | **Checklist item (help text)** | **Page No.** |
| --- | --- | --- | --- |
| T1 | Title | Identify the article as reporting a consensus exercise and state the consensus methods used in the title. *For example, Delphi or nominal group technique.* | 1 |
| I1 | Introduction | Explain why a consensus exercise was chosen over other approaches. | 4 |
| I2 | Introduction | State the aim of the consensus exercise, including its intended audience and geographical scope (national, regional, global). | 4 |
| I3 | Introduction | If the consensus exercise is an update of an existing document, state why an update is needed, and provide the citation for the original document. | 3-4 |
| M1 | Methods Registration | If the study or study protocol was prospectively registered, state the registration platform and provide a link. If the exercise was not registered, this should be stated. *Recommended to include the date of registration.* | 13 |
| M2 | Methods Selection of SC and/or panellists | Describe the role(s) and areas of expertise or experience of those directing the consensus exercise. *For example, whether the project was led by a chair, co-chairs or a steering committee, and, if so, how they were chosen. List their names if appropriate, and whether there were any subgroups for individual steps in the process.* | 13 |
| M3 | Methods Selection of SC and/or panellists | Explain the criteria for panellist inclusion and the rationale for panellist numbers. State who was responsible for panellist selection. | 13 |
| M4 | Methods Selection of SC and/or panellists | Describe the recruitment process (how panellists were invited to participate). *Include communication/advertisement method(s) and locations, numbers of invitations sent, and whether there was centralised oversight of invitations or if panellists were asked/allowed to suggest other members of the panel.* | 13 |
| M5 | Methods Selection of SC and/or panellists | Describe the role of any members of the public, patients or carers in the different steps of the study. | 4-5, 13 |
| M6 | Methods Preparatory research | Describe how information was obtained prior to generating items or other materials used during the consensus exercise. *This might include a literature review, interviews, surveys, or another process.* | 3, 13 |
| M7 | Methods Preparatory research | Describe any systematic literature search in detail, including the search strategy and dates of search or the citation if published already. *Provide the details suggested by the reporting guideline PRISMA and the related PRISMA-Search extension.* | NA |
| M8 | Methods Preparatory research | Describe how any existing scientific evidence was summarised and if this evidence was provided to the panellists. | 3-4, 14 |
| M9 | Methods Assessing consensus | Describe the methods used and steps taken to gather panellist input and reach consensus (for example, Delphi, RAND-UCLA, nominal group technique). *If modifications were made to the method in its original form, provide a detailed explanation of how the method was adjusted and why this was necessary for the purpose of your consensus-based study.* | 13-14 |
| M10 | Methods Assessing consensus | Describe how each question or statement was presented and the response options. State whether panellists were able to or required to explain their responses, and whether they could propose new items. *Where possible, present the questionnaire or list of statements as supplementary material.* | 14 |
| M11 | Methods Assessing consensus | State the objective of each consensus step. *A step could be a consensus meeting, a discussion or interview session, or a Delphi round.* | 13-14 |
| M12 | Methods Assessing consensus | State the definition of consensus (for example, number, percentage, or categorical rating, such as ‘agree’ or ‘strongly agree’) and explain the rationale for that definition. | 14 |
| M13 | Methods Assessing consensus | State whether items that met the prespecified definition of consensus were included in any subsequent voting rounds. | 9, 14 |
| M14 | Methods Assessing consensus | For each step, describe how responses were collected, and whether responses were collected in a group setting or individually. | 13-14 |
| M15 | Methods Assessing consensus | Describe how responses were processed and/or synthesised. *Include qualitative analyses of free-text responses (for example, thematic, content or cluster analysis) and/or quantitative analytical methods, if used.* | 14-15 |
| M16 | Methods Assessing consensus | Describe any piloting of the study materials and/or survey instruments. *Include how many individuals piloted the study materials, the rationale for the selection of those individuals, any changes made as a result and whether their responses were used in the calculation of the final consensus. If no pilot was conducted, this should be stated.* | 13 |
| M17 | Methods Assessing consensus | If applicable, describe how feedback was provided to panellists at the end of each consensus step or meeting. *State whether feedback was quantitative (for example, approval rates per topic/item) and/or qualitative (for example, comments, or lists of approved items), and whether it was anonymised.* | 15 |
| M18 | Methods Assessing consensus | State whether anonymity was planned in the study design. Explain where and to whom it was applied and what methods were used to guarantee anonymity. | 13 |
| M19 | Methods Assessing consensus | State if the steering committee was involved in the decisions made by the consensus panel. *For example, whether the steering committee or those managing consensus also had voting rights.* | 13, 15 |
| M20 | Methods Participation | Describe any incentives used to encourage responses or participation in the consensus process. *For example, were invitations to participate reiterated, or were participants reimbursed for their time.* | 14 |
| M21 | Methods Participation | Describe any adaptations to make the surveys/meetings more accessible. *For example, the languages in which the surveys/meetings were conducted and whether translations or plain language summaries were available.* | 13-14 |
| R1 | Results | State when the consensus exercise was conducted. List the date of initiation and the time taken to complete each consensus step, analysis, and any extensions or delays in the analysis. | 14 |
| R2 | Results | Explain any deviations from the study protocol, and why these were necessary. *For example, addition of panel members during the exercise, number of consensus steps, stopping criteria; report the step(s) in which this occurred.* | 14 |
| R3 | Results | For each step, report quantitative (number of panellists, response rate) and qualitative (relevant socio-demographics) data to describe the participating panellists. | 4-5 |
| R4 | Results | Report the final outcome of the consensus process as qualitative (for example, aggregated themes from comments) and/or quantitative (for example, summary statistics, score means, medians and/or ranges) data. | 8-10 |
| R5 | Results | List any items or topics that were modified or removed during the consensus process. Include why and when in the process they were modified or removed. | 8-10 |
| D1 | Discussion | Discuss the methodological strengths and limitations of the consensus exercise. *Include factors that may have impacted the decisions (for example, response rates, representativeness of the panel, potential for feedback during consensus to bias responses, potential impact of any non-anonymised interactions).* | 12 |
| D2 | Discussion | Discuss whether the recommendations are consistent with any pre-existing literature and, if not, propose reasons why this process may have arrived at alternative conclusions. | 10-12 |
| O1 | Other information | List any endorsing organisations involved and their role. | NA |
| O2 | Other information | State any potential conflicts of interests, including among those directing the consensus study and panellists. Describe how conflicts of interest were managed. | 16 |
| O3 | Other information | State any funding received and the role of the funder. *Specify, for example, any funder involvement in the study concept/design, participation in the steering committee, conducting the consensus process, funding of any medical writing support. This could be disclosed in the methods or in the relevant transparency section of the manuscript. Where a funder did not play a role in the process or influence the decisions reached, this should be specified.* | 16 |

# Supplementary File 3. Detailed results of the corpus-informed linguistic analysis of Round 1 free-text responses

|  |  | **Empowering environment** | **Shifting the balance of power** | **Enabling different relationships** | **Facilitating personal growth** |
| --- | --- | --- | --- | --- | --- |
| **Change mechanisms** | ***Importance*** | Related to “hope” and gaining “control”; central for promoting wellbeing | Understood in relation to ‘empowering environment’ and enabling different relationships. Empowerment essential for recovery. Pessimism in relation to the extent this is actually possible (especially in the UK context). | Confusion about meaning of descriptor. Understood as providing space for people to establish new relationships. Relationships understood as a vehicle for recovery. Perceived as important, but difficult to achieve. | Personal growth explicitly related to empowerment. Understood as important for building a new identity in recovery. |
| ***Cultural difficulty*** | Related to shifting balance of power. Difficult to achieve (in several countries) | Emphasis on difficulty to achieve balance of power (some identified causes: cultural, systematic issues in mental health services, mental health stigma, financial). | Confusion about meaning of descriptor. Difficult to achieve. Main causes identified: difficulty to change roles, culture. | Not difficult to achieve in the RC context |
| ***Wording*** | Not all languages have an equivalent expression to “empowerment”. To emphasise focus on person’s strengths; autonomy; choice and control | Alternative wordings: "narrowing the distance"; to explain what the expression means (e.g. “moving toward an equal relationship”); emphasise equality (e.g. “Holding all perspectives in equal regard.”, “we are equal as human beings”) | To specify type of relationships (e.g. “making it clearer - relationships with who, what kinds of relationships”). Alternative wordings: “collaborative relationships”; “creating community”; "enabling varied relationships" | Individuality sometimes emphasised in alternative wordings (e.g. UK, Japan: “Facilitating individual journeys”, “Independent self-esteem”). Concept of constant growth may not work well in all cultures (e.g. Finland; Czech Republic) |

|  |  | **Valuing equality** | **Learning** | **Tailored to the student** | **Co-production of the RC** | **Social connectedness** | **Community focus** | **Commitment to recovery** |
| --- | --- | --- | --- | --- | --- | --- | --- | --- |
| **Non-modifiable components** | ***Importance*** | Equality is difficult to achieve. Contested labels: “equality” (e.g. for not targeting enough students’ individual needs); “student” (for not emphasising equality enough). Value of equality linked to co-production. | Learning approach perceived as destigmatising but shifting responsibility to the individual. Learning as vehicle for "coping" effectively. Variety of courses as means to tailoring (but difficult to achieve). Importance of curriculum design to assess learning. |  | Difficult to achieve. Emphasis on co-produced sessions. | “social connectedness” mixed up with “community focus”. Understood as embedded in RC | “Community” difficult to achieve due to how RC operates | Difficulty to understand what it means to be “recovery committed” |
| ***Cultural difficulty*** | Difficult to achieve. Absence of payment contributes to equality. | Understood as individual approach to recovery.  Adult learning not popular in some countries. | Difficulties with tailoring associated with cultural practices and lack of resources. | Staff with lived experience. Materials co-produced. | Difficult to achieve. Main causes: people’s character; physical environment/ facilities. | Difficult to achieve. Main causes: organisational context; lack of resources; lack of awareness of RCs | Difficult to assess. Training staff to deliver sessions following RC model. Importance of adherence to values |
| ***Wording*** | Emphasis on accessibility and equity (e.g. Australia). Some alternative wordings: “facilitator […] instead of trainer” (Brazil); ‘participants’ instead of ‘students’ (Finland) | “recovery collage” may not be translatable to some languages (Portuguese); change ‘trainer’ to ‘educator’ (Australia). Importance to adopt non-jargonistic terminology (educational terminology is not suitable when facilitators lack pedagogical training - Finland) | Understood as student-centred courses (to be reflected in the wording, e.g.: “Adapted to the student”; “person centred"). Occasionally understood as “cultural adaptation”, difficult due to lack of support | “co-production” not fully understood (by participants across cultures); need to describe it or provide examples | Emphasis on social connectedness beyond RC. Preference for “bonds” to “connectedness (Brazil, Australia); emphasis on the (physical) space. | Specify what is meant by “community” | “recovery” sometimes misunderstood for “clinical recovery”, need for more specific descriptions (Czech Republic) |

# Supplementary File 4. Wording revisions from Round 1 to Round 2

## Mechanisms

| **No.** | **Round 1 wording** | **Round 2 wording** | **Reason** |
| --- | --- | --- | --- |
| (a) | Empowering environment | Empowering, autonomy-supporting environment | Some languages such as German do not have an equivalent expression to “empowerment” so it is hard to understand for them. Other comments suggested this focuses on person’s strengths; autonomy; choice and control. |
| (b) | Shifting the balance of power | Moving toward an equal partnership | “Shifting the balance of power” can sound confrontational or unclear across contexts; “equal partnership” communicates the intended direction (toward equality) more accessibly. |
| (c) | Enabling different relationships | Connecting with peers and working together | “Different relationships” is vague (different from what? with who?). The original mechanism specifically highlights working together and peer connection (link [here](https://link.springer.com/article/10.1186/s12888-022-04253-y/figures/1)). |
| (d) | Facilitating personal growth | Facilitating recovery | “Growth” can imply a constant upward trajectory, which may feel tiring/pressurising or culturally mismatched. “Recovery journeys” preserves change/hope while allowing different paces and directions. Not everyone likes ‘journeys’. |

## Non-modifiable items

| **No.** | **Round 1 wording** | **Round 2 wording** | **Reason** |
| --- | --- | --- | --- |
| 1 | **Valuing equality**: The contributions and assets of students, trainers (peers, clinicians, external) and other staff are equally valued. No one is judged or treated differently because of their background or mental health difficulties. | **Valuing equality**: The contributions and assets of students, trainers (including people with lived experience), professionals, and other contributors are equally respected and valued. No one is judged or treated differently because of their background or mental health difficulties, and accessibility is actively supported. | Emphasis on highlighting accessibility and equity. Some alternative wordings suggested “use facilitator […] instead of trainer”; ‘participants’ instead of ‘students’ |
| 2 | **Learning**: Recovery Colleges follow an adult education approach whereby students and trainers collaborate and learn from each other by sharing experiences, knowledge and skills. Students have responsibility for their learning and learn through interactive and reflective exercises. Students gain self-awareness, understanding of their difficulties and practical, relevant self-management skills. Students choose courses which best suit their interests and aspirations. | **Learning**: Recovery Colleges follow an adult education approach in which students and trainers collaborate and learn from each other by sharing experiences, knowledge and skills. Students have responsibility for their learning and learn through interactive and reflective exercises. Students gain self-awareness, understanding of their difficulties and practical, relevant self-management skills. Students choose courses which best suit their interests and aspirations. This learning approach does not require formal teaching qualifications; it focuses on clear, accessible communication and shared learning. | ‘trainer’ to ‘educator’; Importance to adopt non-jargonistic terminology (educational terminology not suitable when facilitators lack pedagogical training) |
| 3 | **Tailored to the student**: Recovery Colleges don’t offer a one-size-fits-all experience. Students’ individual needs are actively enquired about and accommodated during courses (e.g. personalised handouts, translated text, materials adapted for learning difficulties). Their needs outside the course are also accommodated (e.g. buddy service, transport help, individual learning plans). | **Tailored to the student**: Recovery Colleges don’t offer a one-size-fits-all experience. The College takes a student-centred and flexible approach by asking about students’ needs and preferences and responding in ways that are feasible in that setting. Tailoring may involve reasonable adjustments during courses (e.g. alternative formats, personalised written materials, translated text, or materials adapted for learning difficulties), support around participation (e.g. buddy service, transport help, individual learning plans), or cultural and linguistic adaptation of content and delivery. Needs are asked about and responded to, as far as local context and resources allow. | Understood as student-centred courses (to be reflected in the wording – mentioned by participants of different countries; suggestions: “Adapted to the student”; “person centred"). Other participants understand it as “cultural adaptation” and find it difficult due to lack of support. |
| 4 | **Coproduction of the Recovery College**: People with lived experience (Peer Trainers and students) are brought together with professionals and subject experts to design and deliver all aspects of the Recovery College. This includes collaborative decision making about the prospectus, courses, college policies, staff recruitment, advertising, etc., as well as the co-design and co-delivery of all courses by a Peer Trainer and other subject-expert. | **Coproduction of the Recovery College**: People with lived experience, professionals and subject experts work together to design and deliver all aspects of the Recovery College. This includes shared decision-making about the prospectus, courses, College policies, staff recruitment, advertising, and evaluation. Coproduction also includes the co-design and co-delivery of courses by a person with lived experience and another contributor with relevant expertise, for example by jointly deciding course topics, developing course materials together, and/or co-facilitating sessions. Coproduction means key decisions are made together, not by seeking feedback after decisions have been made. | “Coproduction” is not consistently understood across cultures; plain-language definition + examples reduce misunderstanding and improve transferability. |
| 5 | **Social connectedness**: Both the culture and the physical environment of the college provide students with opportunities to develop connections with others. The learning space is relaxed, e.g. nonclinical chair layout, access to drinks facilities, shared spaces for socialising. Trainers recognise and cater for students' social needs, e.g. organising exercises and breaks for chatting, sharing experiences and developing friendships. | **Social connectedness**: Both the culture and the physical environment of the college provide students with opportunities to develop connections and bonds with others. The learning space is relaxed, e.g. non-clinical chair layout, access to drinks facilities, shared spaces for socialising. Trainers recognise and cater for students’ social needs, e.g. organising activities and breaks for chatting, sharing experiences and developing friendships. The College also supports students to build or maintain supportive connections beyond the Recovery College, e.g. signposting to peer or community groups. | Some comments emphasis on social connectedness beyond RC. Preference for “bonds” to “connectedness; emphasis on the importance of the (physical) space. |
| 6 | **Community focus**: Recovery Colleges engage with community organisations (e.g. mental health charities, artistic/sporting groups) and Further Education colleges to co-produce relevant courses. The college provides students with information, handouts and events which support students' pathways into valued activities, roles, relationships and support in the community. | **Community focus**: Recovery Colleges engage with community organisations (i.e., local non-clinical organisations and groups outside the Recovery College, such as mental health charities, artistic/sporting groups, or volunteering, and mainstream adult education colleges) to co-produce relevant courses. The Recovery College provides students with information and events which support students’ pathways into valued activities, roles, relationships and support in the community. | Few comments were received, but these indicated a need for specifying what is meant by “community”. |
| 7 | **Commitment to recovery**: Recovery College workers talk with conviction and enthusiasm about the service and are dedicated to students' recovery. There is a positive energy in the college and its activities, based on shared values about the recovery principles on which the college is based. | **Commitment to recovery**: Recovery College workers talk with conviction and enthusiasm about the service and are dedicated to students’ recovery. There is a positive energy in the College and its activities, based on shared values about the recovery principles on which the college is based. Here, “recovery” refers to personal and social recovery (living a meaningful life, with or without ongoing symptoms), not only clinical recovery or symptom reduction. | Concept of “recovery” sometimes misunderstood for “clinical recovery”, need to describe it more specifically. |

## Modifiable items

The third answer choice will be added.

1. Type 1 mainly
2. Type 2 mainly
3. Both Type 1 and Type 2 (blended)

# Supplementary File 5. Changes made after Round 2

| **Item** | **R2 wording** | **Final wording** |
| --- | --- | --- |
| Mechanism (c) | Connecting **with peers** and working together | Connecting and working together |
| Non-Modifiable Item 1 | **Valuing equality**: The contributions and assets of students, trainers (including people with lived experience), professionals, and other contributors are equally respected and valued. No one is judged or treated differently because of their background or mental health difficulties, and accessibility is actively supported. | **Valuing equality**: The contributions and assets of **people with lived experience, students, trainers, staff** and other contributors are equally respected and valued. No one is judged or treated differently because of their background or mental health difficulties, and accessibility is actively supported. |
| Non-Modifiable Item 5 | **Social connectedness**: Both the culture and the physical environment of the college provide students with opportunities to develop connections and bonds with others. The learning space is relaxed, e.g. non-clinical chair layout, access to drinks facilities, shared spaces for socialising. Trainers recognise and cater for students’ social needs, e.g. organising activities and breaks for chatting, sharing experiences and developing friendships. The College also supports students to build or maintain supportive connections beyond the Recovery College, e.g. signposting to **peer or** community groups. | **Social connectedness:** Both the culture and the physical environment of the college provide students with opportunities to develop connections and bonds with others. The learning space is relaxed, e.g. non-clinical chair layout, access to drinks facilities, shared spaces for socialising. Trainers recognise and cater for students’ social needs, e.g. organising activities and breaks for chatting, sharing experiences and developing friendships. The College also supports students to build or maintain supportive connections beyond the Recovery College, e.g. signposting to community groups. |

# Supplementary File 6. Original and final wording

## Mechanisms

| **No.** | **Original wording** | **Final wording** |
| --- | --- | --- |
| (a) | Empowering environment | Empowering, autonomy-supporting environment |
| (b) | Shifting the balance of power | Moving toward an equal partnership |
| (c) | Enabling different relationships | Connecting and working together |
| (d) | Facilitating personal growth | Facilitating recovery |

## Non-modifiable items

| **No.** | **Original wording** | **Final wording** |
| --- | --- | --- |
| 1 | **Valuing equality**: The contributions and assets of students, trainers (peers, clinicians, external) and other staff are equally valued. No one is judged or treated differently because of their background or mental health difficulties. | **Valuing equality**: The contributions and assets of people with lived experience, students, trainers, staff and other contributors are equally respected and valued. No one is judged or treated differently because of their background or mental health difficulties, and accessibility is actively supported. |
| 2 | **Learning**: Recovery Colleges follow an adult education approach whereby students and trainers collaborate and learn from each other by sharing experiences, knowledge and skills. Students have responsibility for their learning and learn through interactive and reflective exercises. Students gain self-awareness, understanding of their difficulties and practical, relevant self-management skills. Students choose courses which best suit their interests and aspirations. | **Learning**: Recovery Colleges follow an adult education approach in which students and trainers collaborate and learn from each other by sharing experiences, knowledge and skills. Students have responsibility for their learning and learn through interactive and reflective exercises. Students gain self-awareness, understanding of their difficulties and practical, relevant self-management skills. Students choose courses which best suit their interests and aspirations. This learning approach does not require formal teaching qualifications; it focuses on clear, accessible communication and shared learning. |
| 3 | **Tailored to the student**: Recovery Colleges don’t offer a one-size-fits-all experience. Students’ individual needs are actively enquired about and accommodated during courses (e.g. personalised handouts, translated text, materials adapted for learning difficulties). Their needs outside the course are also accommodated (e.g. buddy service, transport help, individual learning plans). | **Tailored to the student**: Recovery Colleges don’t offer a one-size-fits-all experience. The College takes a student-centred and flexible approach by asking about students’ needs and preferences and responding in ways that are feasible in that setting. Tailoring may involve reasonable adjustments during courses (e.g. alternative formats, personalised written materials, translated text, or materials adapted for learning difficulties), support around participation (e.g. buddy service, transport help, individual learning plans), or cultural and linguistic adaptation of content and delivery. Needs are asked about and responded to, as far as local context and resources allow. |
| 4 | **Coproduction of the Recovery College**: People with lived experience (Peer Trainers and students) are brought together with professionals and subject experts to design and deliver all aspects of the Recovery College. This includes collaborative decision making about the prospectus, courses, college policies, staff recruitment, advertising, etc., as well as the co-design and co-delivery of all courses by a Peer Trainer and other subject-expert. | **Coproduction of the Recovery College**: People with lived experience, staff and subject experts work together to design and deliver all aspects of the Recovery College. This includes shared decision-making about the prospectus, courses, College policies, staff recruitment, advertising, and evaluation. Coproduction also includes the co-design and co-delivery of courses by a person with lived experience and another contributor with relevant expertise, for example by jointly deciding course topics, developing course materials together, and/or co-facilitating sessions. Coproduction means key decisions are made together, not by seeking feedback after decisions have been made. |
| 5 | **Social connectedness**: Both the culture and the physical environment of the college provide students with opportunities to develop connections with others. The learning space is relaxed, e.g. nonclinical chair layout, access to drinks facilities, shared spaces for socialising. Trainers recognise and cater for students' social needs, e.g. organising exercises and breaks for chatting, sharing experiences and developing friendships. | **Social connectedness**: Both the culture and the physical environment of the college provide students with opportunities to develop connections and bonds with others. The learning space is relaxed, e.g. non-clinical chair layout, access to drinks facilities, shared spaces for socialising. Trainers recognise and cater for students’ social needs, e.g. organising activities and breaks for chatting, sharing experiences and developing friendships. The College also supports students to build or maintain supportive connections beyond the Recovery College, e.g. signposting to community groups. |
| 6 | **Community focus**: Recovery Colleges engage with community organisations (e.g. mental health charities, artistic/sporting groups) and Further Education colleges to co-produce relevant courses. The college provides students with information, handouts and events which support students' pathways into valued activities, roles, relationships and support in the community. | **Community focus**: Recovery Colleges engage with community organisations (i.e., local non-clinical organisations and groups outside the Recovery College, such as mental health charities, artistic/sporting groups, or volunteering, and mainstream adult education colleges) to co-produce relevant courses. The Recovery College provides students with information and events which support students’ pathways into valued activities, roles, relationships and support in the community. |
| 7 | **Commitment to recovery**: Recovery College workers talk with conviction and enthusiasm about the service and are dedicated to students' recovery. There is a positive energy in the college and its activities, based on shared values about the recovery principles on which the college is based. | **Commitment to recovery**: Recovery College workers talk with conviction and enthusiasm about the service and are dedicated to students’ recovery. There is a positive energy in the College and its activities, based on shared values about the recovery principles on which the college is based. Here, “recovery” refers to personal and social recovery (living a meaningful life, with or without ongoing symptoms), not only clinical recovery or symptom reduction. |

## Modifiable items

The wording of the modifiable items was unchanged. However, a third response option was added:

1. Type 1 mainly
2. Type 2 mainly
3. Both Type 1 and Type 2 (blended)
